# Supplementary material
Source: publisher figshare collection journal article supplement (https://tandf.figshare.com/ndownloader/files/13208993)
Supplement: Supplementary file 1 [file 13208993]

**Synthesis and Anti-tubercular Activity Evaluation of Novel 4-Furano-coumarins & 3-Furano-chromones**

Ankita Singh,1 Devla Bimal,1 Rajesh Kumar,1 Vipin K Maikhuri,1 M. Thirumal,1 Nihar Nalini Senapati2,* and Ashok K Prasad1,*

*1Bioorganic Laboratory, Department of Chemistry, University of Delhi, Delhi-110007, India*

2*Department of Anaesthesia, PGIMER, Dr RML Hospital, New Delhi- 110 001, India*

*E-mail: [ashokenzyme@gmail.com](mailto:ashokenzyme@gmail.com), dr.nihar@*[*yahoo.co.in*](http://yahoo.co.in/) *Tel. 011-27662486.*

**Supporting Information**

**Table of Contents**

Experimental**........................................................................................................................S3**

Synthesis and characterization data of compound **2c…………...………………..………….S3**

General procedure for the synthesis and characterization data of compound **3a-d……….…S4**

Synthesis and characterization data of compound **6d……...…………………..…………….S5**

Synthesis and characterization data of compound **7d……………………….………………S6**

General procedure for the synthesis and characterization data of compound **8a-d.....……...S6**

X-Ray diffraction studies of compound **3a..........................................................................S7**

Anti-tubercular Activity: Determination of Minimum Inhibitory Concentrations (MIC).....S8

**Figure S1:** 1H NMR spectrum of compound **2c................................................................S10**

**Figure S2:** 13C NMR spectrum of compound **2c...............................................................S10**

**Figure S3:**1HNMR spectrum of compound **3a................................................................S11**

**Figure S4:** 13C NMR spectrum of compound **3a...............................................................S11**

**Figure S5:** 1H NMR spectrum of compound **3b................................................................S12**

**Figure S6:** 13C NMR spectrum of compound **3b...............................................................S12**

**Figure S7:** 1H NMR spectrum of compound **3c................................................................S13**

**Figure S8:** 13C NMR spectrum of compound **3c...............................................................S13**

**Figure S9:** 1H NMR spectrum of compound **3d................................................................S14**

**Figure S10:** 13C NMR spectrum of compound **3d.............................................................S14**

**Figure S11:** 1H NMR spectrum of compound **6d..............................................................S15**

**Figure S12:** 13C NMR spectrum of compound **6d.............................................................S15**

**Figure S13:** 1H NMR spectrum of compound **7d.............................................................S16**

**Figure S14:** 13C NMR spectrum of compound **7d............................................................S16**

**Figure S15:** 1H NMR spectrum of compound **8a.............................................................S17**

**Figure S16:** 13C NMR spectrum of compound **8a............................................................S17**

**Figure S17:+** 1H NMR spectrum of compound **8b.............................................................S18**

**Figure S18**: 13C NMR spectrum of compound **8b..........................................................S18**

**Figure S19:** 1H NMR spectrum of compound **8c............................................................S19**

**Figure S20:** 13C NMR spectrum of compound **8c...........................................................S19**

**Figure S21:** 1H NMR spectrum of compound **8d............................................................S20**

**Figure S22:** 13C NMR spectrum of compound **8d...........................................................S20**

**Experimental**

**General**

Melting points were determined on Buchi M-560 instrument. The IR spectra were recorded on a Perkin-Elmer model 2000 FT-IR spectrometer by making KBr disc for solid samples and thin film for oils. The 1H and 13C NMR spectra were recorded on Jeol alpha-400 spectrometer at 400 and 100.6 MHz, respectively using TMS as internal standard. The chemical shift values are on δ scale and the coupling constants (*J*) are in Hz. The mass spectra recording have been done on a micro TOF-Q instrument from Bruker Daltonics, Bremen and 6520 Q-TOF instrument from Agilent Technologies on ESI positive mode. The single crystal diffraction data was collected on a X’Calibur single crystal X-ray diffracter having CCD camera [graphite monochromated Mo Kα radiation (λ = 0.71073 Å)] in USIC, University of Delhi, India.Analytical TLCs were performed on pre-coated Merck silica-gel 60F254 plates; the spots were detected either under UV light or on charring with 5% sulphuric acid in ethanol. Silica gel (100-200 mesh) has been used for column chromatography.

**Synthesis of 4-ethynyl-7-isopropoxycoumarin (2c)**

To a stirred solution of 4-hydroxy-7-isopropoxycoumarin (**1c**; 4.54 mmol) in 10 mL DCM, triethylamine (22.7 mmol) was added and the reaction mixture was brought at 0 oC followed by drop-wise addition of triflic anhydride (4.99 mmol). Then, the reaction mixture was stirred for 1 h at 0 oC and the progress of the reaction was monitored on TLC. On completion, the reaction mixture was passed through silica pad, filtrate was evaporated on high vacuum to obtain the crude triflated product. The crude product (~ 4.20 mmol) was dissolved in acetonitrile (10 mL) and stirred at room temperature. *N*,*N*-diisopropylethylamine (6.3 mmol), CuI (0.42 mmol), *tetrakis*(triphenylphosphene) palladium (0.21 mmol) and trimethylsilylacetylene (4.62 mmol) was added to the stirred reaction mixture and stirring continued at room temperature for 6 h. After completion, the reaction mixture was dried over vacuum. The dried crude trimethylsilylethynylcoumarin (~ 4.32 mmol) was dissolved in THF (10 mL) followed by the addition of tetrabutylammonium fluoride (4.32 mmol) at 25-30 oC. The reaction mixture was stirred for 15 min. After complete desilylation, the reaction mixture was dried over high vacuum. The product was purified over silica gel column using ethyl acetate-petroleum ether as eluting solvent to obtain the titled compound **2c** as a yellow solid in 60 % overall yield. M. Pt = 119- 121 oC. IR (cm-1, film): 2982, 2123, 1720, 1245, 1108. 1H NMR (400 MHz, CDCl3): 7.73 (1H, d, *J* = 8.4 Hz), 6.83-6.86 (1H, m), 6.77 (1H, d, *J* = 2.0 Hz), 6.43 (1H, s), 4.62 (1H, sep, *J* = 6.0 Hz), 3.72 (1H, s), 1.39 (3H, s), 1.37 (3H, s). 13C NMR (100.6 MHz, CDCl3): 161, 160, 155, 136, 127, 116, 113, 111, 102, 89, 76, 70, 21. HRMS (ESI) *m/z* calcd. for C14H13O3 [M+H]+ 228.0859, found 228.0847.

**General procedure for the synthesis of 4-(3**'**-ethoxycarbonyl-2**'**-methylfuran-5**'**-yl)-coumarins 3a-d**

To a stirred solution of 4-ethynylcoumarin (**2a-d**; 0.59 mmol)in DMF (10 mL)were added ethyl acetoacetate (1.76 mmol), silver carbonate (1.17 mmol) and potassium acetate (1.17 mmol) and the reaction was refluxed at 80 oC for 10-12 h. On completion, the compound was extracted from the reaction mixture using ethyl acetate (3 x 50 mL). The combined ethyl acetate layer was washed with saturated NaCl solution, dried over anhydrous Na2SO4 and then concentrated to dryness under vacuum. The crude product thus obtained was purified over silica gel column using ethyl acetate-petroleum ether as an eluent to get pure compounds **3a-d** as solids in 80-90% yield, respectively.

**4-(3**'**-Ethoxycarbonyl-2**'**-methylfuran-5**'**-yl)-coumarin (3a)**

It was obtained as yellow solid in 90 % yield; M.Pt. = 119-121 oC. IR (cm-1, film): 2926, 2335, 1720, 1608, 1242, 1087. 1H NMR (400 MHz, CDCl3): δ 8.03-8.05 (1H, m), 7.52-7.57 (1H, m), 7.31-7.73 (2H, m), 7.28 (1H, s), 6.65 (1H, s), 4.32 (2H, q, *J*= 7.2 Hz), 2.69 (3H, s), 1.36 (3H, t, *J* = 7.6 Hz). 13C NMR (100.6 MHz, CDCl3): 163, 161, 160, 154, 145, 141, 131, 125, 124, 117, 116, 116, 115, 60, 14. HRMS (ESI) *m/z* calcd. for C17H15O5 [M+H]+  299.0914, found 299.0928.

**4-(3**'**-Ethoxycarbonyl-2**'**-methylfuran-5**'**-yl)-7-methoxycoumarin (3b)**

The compound was obtained as yellow solid in 85 % yield. M.pt. = 122-123 oC. IR (cm-1, film): 2927, 2335, 1708, 1510, 1425, 1365, 1091. 1H NMR (400 MHz, CDCl3): δ 7.98 (1H, d, *J* = 7.6 Hz), 7.27 (1H, s), 6.87-6.92 (2H, m), 6.52 (1H, s), 4.35 (2H, q, *J* = 7.2 Hz), 3.9 (3H, s), 2.72 (3H, s), 1.39 (3H, t, *J* = 6.8 Hz). 13C NMR (100.6 MHz, CDCl3): 163, 161, 156, 146, 141, 126, 116, 114, 113, 109, 108, 102, 70, 60, 14. HRMS (ESI) *m/z* calcd. for C18H17O6 [M+H]+ 329.1020, found 329.1037.

**4-(3**'**-Ethoxycarbonyl-2**'**-methylfuran-5**'**-yl)-7-isopropoxycoumarin (3c)**

The compound was obtained as yellow solid in 80% yield. M.pt.= 127-129 oC. . IR (cm-1, film): 2980, 2337, 1720, 1612, 1240, 1093. 1H NMR (400 MHz, CDCl3): δ 7.95 (1H, d, *J* = 8.4 Hz), 7.26 (1H, s), 6.84-6.87 (2H, m), 6.50 (1H, s), 4.62 (1H, sep, *J* = 7.2 Hz), 4.35 (2H, q, *J* = 7.6 Hz), 2.71 (3H, s), 1.39 (9H, m). 13C NMR (100.6 MHz, CDCl3): 163, 161, 156, 146, 141, 126, 116, 114, 113, 109, 108, 102, 70, 60, 21, 14. HRMS (ESI) *m/z* calcd. for C20H21O6 [M+H]+  357.1346, found 357.1333.

**4-(3**'**-Ethoxycarbonyl-2**'**-methylfuran-5**'**-yl)-7, 8-dimethoxycoumarin (3d)**

The compound was obtained as yellow solid in 81 % yield. M.pt. = 125-127 oC. IR (cm-1, film): 2978, 2335, 1718, 1604, 1249, 1240, 1101. 1H NMR (400 MHz, CDCl3): δ 7.78 (1H, d, *J* = 8.4 Hz), 7.27 (1H, s), 6.93 (2H, d, *J* = 8.8 Hz), 6.54 (1H, s), 4.35 (2H, q, *J* = 7.6 Hz), 4.00 (3H, s), 3.98 (3H, s), 2.72 (3H, s), 1.40 (3H, t, *J* = 7.2 Hz). 13C NMR (100.6 MHz, CDCl3): 163, 161, 160, 155, 146, 141, 136, 121, 116, 115, 110, 108, 108, 61, 60, 56, 14. HRMS (ESI) *m/z* calcd. for C19H19O7 [M+H]+ 359.1125, found 359.1138.

**Synthesis of 3-iodo-7-ethoxychromone (6d)**

To a solution of 3-(dimethylamino)-1-(4-ethoxy-2-hydroxyphenyl)prop-2-en-1-one (**5c**; 4.25 mmol) in methanol (10 mL), iodine (4.25 mmol) was added and the reaction mixture was stirred at 25-30 oC for 24 h. After completion, the reaction mixture was dried over high vacuum. The crude product thus obtained was purified over silica gel column using ethyl acetate-petroleum ether as an eluent to obtain pure compound **6d** as a pale yellow solid in 78 % yield. M. Pt. = 101-103 oC. IR (cm-1, film): 2984, 1723, 1665, 1201, 1104.1H NMR (400 MHz, CDCl3): 8.14 (1H, s), 8.05 (1H, d, *J* = 9.2 Hz), 6.90-6.93 (1H, m), 6.74 (1H, s), 4.06 (2H, q, *J* = 6.8 Hz), 1.42 (3H, t, *J* = 6.8 Hz). 13C NMR (100.6 MHz, CDCl3): 175, 164, 159, 158, 127, 117, 115, 110, 101, 64, 14. HRMS (ESI) *m/z* calcd. for C11H9IO3 [M+H]+ 316.9669, found 316.9676.

**Synthesis of 3-ethynyl-7-ethoxychromone (7d)**

To a solution of 3-iodo-7-ethoxychromone (**6d**; 3.79 mmol) in acetonitrile (12 mL), *N*,*N*-diisopropylethylamine (5.68 mmol), CuI (0.37 mmol), *tetrakis*(triphenylphosphene) palladium (0.14 mmol) and trimethylsilylacetylene (4.16 mmol) was added and the reaction was stirred at room temperature for 6 h. After completion, the reaction mixture was dried over vacuum and the crude product (~3.49 mmol) thus obtained was taken in THF (10 mL) followed by the addition of tetrabutylammonium fluoride (3.49 mmol) at 25-30 oC. The reaction mixture was stirred for 15 min. After complete desilylation, the reaction mixture was dried over high vacuum. The crude product was purified over silica gel column using ethyl acetate-petroleum ether as an eluent to obtain pure compound **7d** as a yellow solid in 70% overall yield. M. Pt. = 106-108 oC. IR (cm-1, film): 2976, 2120, 1718, 1665, 1459, 1114. 1H NMR (400 MHz, CDCl3): 8.09 (1H, s), 8.06 (1H, d, *J* = 2.4 Hz), 6.90-6.93 (1H, s), 6.75 (1H, d, *J* = 2.4 Hz), 4.06 (2H, q, *J* = 6.8 Hz), 3.22 (1H, s), 1.42 (3H, t, *J* = 6.8 Hz). 13C NMR (100.6 MHz, CDCl3): 174, 163, 158, 157, 127, 117, 115, 109, 100, 82, 74, 64, 14. HRMS (ESI) *m/z* calcd. for C13H11O3 [M+H]+ 215.0703, found 215.0714.

**General procedure for the synthesis of 3-(3**'**-ethoxycarbonyl-2**'**-methylfuran-5**'**-yl)-chromones 8a-d**

To the stirred solution of 3-ethynylchromone (**7a-d**; 0.59 mmol)in DMF (10 mL)were added ethyl acetoacetate (1.76 mmol), silver carbonate (1.98 mmol) and potassium acetate (1.98 mmol) and the reaction was refluxed at 80 oC for 9-12 h. On completion, the compound was extracted from the reaction mixture using ethyl acetate (3 x 50 mL). The combined ethyl acetate layer was washed with saturated NaCl solution, dried over anhydrous Na2SO4 and then concentrated to dryness under vacuum. The crude product thus obtained was purified by column chromatography over silica gel using ethyl acetate-petroleum ether as elutent to afford compound **8a-d** as solid in 82-90% yield, respectively.

**3-(3**'**-Ethoxycarbonyl-2**'**-methylfuran-5**'**-yl)-chromone (8a)**

The compound was obtained as light yellow solid in 87 % yield. M.Pt. = 146-148 oC. IR (cm-1, film): 2980, 1718, 1668, 1612, 1463, 1274, 1244, 1145, 761. 1H NMR (400 MHz, CDCl3): δ 8.82 (1H, s), 8.25 (1H, d, *J* = 7.6 Hz), 7.66 (1H, t, *J* = 7.2 Hz), 7.39(1H, d, *J* = 8.4 Hz), 7.32 (1H, t, *J* = 7.6), 7.24 (1H, s), 4.34 (2H, q, *J* = 7.2 Hz), 2.67 (3H, s), 1.38 (3H, t, *J* = 6.8 Hz). 13C NMR (100.6MHz, CDCl3): 176, 166, 157, 155, 147, 134, 130, 126, 124, 121, 120, 119, 117, 61, 22, 14. HRMS (ESI) *m/z* calcd. for C17H15O5 [M+H]+  299.0914, found 299.0927.

**3-(3**'**-Ethoxycarbonyl-2**'**-methylfuran-5**'**-yl)-6-methoxychromone (8b)**

The compound was obtained as light yellow solid in 85 % yield. M.Pt. =125-127 oC. IR (cm-1, film): 2927, 1718, 1664, 1620, 1473, 1274, 1244, 775. 1H NMR (400 MHz, CDCl3): δ 8.80 (1H, s), 7.58 (1H, d, *J* = 3.2 Hz), 7.31 (1H, d, *J* = 9.2 Hz), 7.19-7.24 (2H, m), 4.32 (2H, q, J = 7.6 Hz), 3.83 (3H, s), 2.65 (3H, s), 1.36 (3H, t, *J* = 7.2 Hz). 13C NMR (100.6 MHz, CDCl3): 176, 166, 157, 156, 150, 147, 130, 125, 124, 122, 120, 119, 118, 105, 61, 55, 22, 14. HRMS (ESI) *m/z* calcd. for C18H17O6 [M+H]+  329.1020, found 329.1033.

**3-(3**'**-Ethoxycarbonyl- 2**'**-methylfuran-5**'**-yl)-7-methoxychromone (8c)**

The compound was obtained as light yellow solid in 90% yield. M.Pt. = 126-127oC. IR (cm-1, film): 2929, 1720, 1660, 1614, 1446, 1269, 1246, 1172, 775. 1H NMR (400 MHz, CDCl3): δ 8.83 (1H, s), 7.60 (1H, d, *J* = 3.2 Hz), 7.34 (1H, d, *J* = 9.2 Hz), 7.24-7.26 (2H, m), 4.33 (2H, q, *J* = 7.6 Hz), 3.85 (3H, s), 2.67 (3H, s), 1.36 (3H, t, *J* = 7.6 Hz). 13C NMR (100.6 MHz, CDCl3): 175, 165, 157, 155, 150, 147, 129, 125, 124, 121, 119.0, 118, 105, 60, 55, 22, 14. HRMS (ESI) *m/z* calcd. for C18H17O6 [M+H]+  329.1020, found 329.1032.

**3-(3**'**-Ethoxycarbonyl-2**'**-methylfuran-5**'**-yl)-7-ethoxychromone (8d)**

The compound was obtained as light yellow solid in 82 % yield. M.Pt. = 128-130 oC. IR (cm-1, film): 2980, 1722, 1662, 1620, 1456, 1273, 1246, 1168, 2066, 775. 1H NMR (400 MHz, CDCl3): δ 8.81 (1H, s), 8.14 (1H, d, *J* = 8.4 Hz), 7.20 (1H, s), 6.86 (1H, s), 6.77 (1H, s), 4.31 (2H, q, *J* = 7.6 Hz), 3.99 (2H, q, *J* = 7.2 Hz), 2.66 (3H, s), 1.21-1.40 (6H, m). 13C NMR (100.6 MHz, CDCl3): 175, 166, 164, 157, 147, 130, 128, 125, 120, 119, 115, 113, 100, 64, 61, 22, 14.3. HRMS (ESI) *m/z* calcd. for C19H19O6 [M+H]+  343.1176, found 343.1189.

X-Ray diffraction studies on 4-(3'-ethoxycarbonyl-2'-methylfuran-5'-yl)-coumarin (3a)

Single crystal suitable for X-ray diffraction studies were grown by dissolving the compound 3a in chloroform and allowing slow evaporation of the solvent at room temperature. The X-ray diffraction data was collected at temperature 293 K with graphite monochromated Mo Kα radiation (λ = 0.71073 Å). The structure was solved by direct methods using SHELXS-97 and then refined by full-matrix least-squares method on F2 (SHELXL-97).1 All calculations were carried out using WinGX package of the crystallographic programs.2 For the molecular graphics, the programs DIAMOND-23 and Mercury4 have been used. Molecular structure was drawn using ORTEP software as given in Figure 2 in manuscript. The complete crystallographic data is given in Table 2.

**Table 2**. Single crystal X-ray diffraction data of 4-(3'-ethoxycarbonyl-2'-methylfuran-5'-yl)-coumarin (**3a**).

|  | **Compound 3a** |
| --- | --- |
| **Empirical formula** | C17H14O5 |
| **Formula weight** | 298.28 |
| **Crystal system** | Triclinic |
| **Space group** | P-1 |
| **Unit cell dimensions** | a=7.3936(9)  α=101.628o(12) |
| b=7.4098(10)  β=96.196 o (11) |
| c=12.8778(19)  γ =90.453 o (10) |
| **Volume** | 686.68(16) Å3 |
| **Z** | 2 |
| **Density** | 1.443 mg/m3 |
| **Absorption coefficient** | 0.107 mm-1 |
| **F(000)** | 312 |
| **Index ranges** | -9< = h =<9  -8< = k =<9  -17< = l =<17 |
| **R(int)** | 0.0279 |
| **GOF on F2** | 1.084 |
| **Final R indices** | R1 = 0.1144 |
| **I>2sigma(I)** | wR2 = 0.3263 |
| **R indices** | R1 = 0.1301 |
| **All data** | wR2 = 0.3358 |
| **CCDC** | 1542202 |

Anti-tubercular Activity: Determination of Minimum Inhibitory Concentrations (MIC)

The reference strain *M. tuberculosis* H37Rv was obtained from the Department of Microbiology, V. P. Chest Institute, University of Delhi, India. The culture was maintained on Middlebrook 7H9 medium (Difco Laboratories, MI, USA).The MICs of the test compounds 3a-d, 8a-d and the first line drugs isoniazid, rifampicin, ethambutol and streptomycin taken as reference standards, were determined using the micro-plate alamar blue assay (MABA).5 The required amount of 7H9 medium, the calculated amount of the drug and 1x106 cells from the single-cell suspension prepared from a log-phase culture of M. tuberculosis H37Rv were added to each well, so as to make up the volume to 200 mL. The plates were then sealed with parafilm and incubated aerobically at 37 °C. After 10-12 days of incubation, 30 mL of 0.02 % resazurin solution was added to each well and the plates were again incubated overnight at 37 °C before being observed for colour change. A colour change from blue to pink was considered as growth and the MIC value was recorded as the lowest drug concentration that prevented visible growth/colour change. MICs and each concentration were checked in triplicate in a micro-plate, with the entire procedure being repeated a minimum of three times.

**Figure S1:** 1H NMR (400 MHz, CDCl3) of compound **2c**.

**Figure S2**: 13C NMR (100.6 MHz, CDCl3) of compound **2c**.

**Figure S3:** 1H NMR (400 MHz, CDCl3) of compound **3a**.

**Figure S4**: 13C NMR (100.6 MHz, CDCl3) of compound **3a**.

**Figure S5**: 1H NMR (400 MHz, CDCl3)of compound **3b**.

**Figure S6**: 13C NMR (100.6 MHz, CDCl3) of compound **3b**.

**Figure S7**: 1H NMR (400 MHz, CDCl3)of compound **3c**.

**Figure S8**: 13C NMR (100.6 MHz, CDCl3)ofcompound **3c**.

**Figure S9**: 1H NMR (400 MHz, CDCl3)of compound **3d**.

**Figure S10**: 13C NMR (100.6 MHz, CDCl3)of compound **3d**.

**Figure S11**: 1H NMR (400 MHz, CDCl3)of compound **6d**.

**Figure S12**: 13C NMR (100.6 MHz, CDCl3)of compound **6d.**

**Figure S13**: 1H NMR (400 MHz, CDCl3)of compound **7d.**

**Figure S14**: 13C NMR (100.6 MHz, CDCl3)of compound **7d**

**Figure S15**: 1H NMR (400 MHz, CDCl3)of compound **8a**.

**Figure S16**: 13C NMR (100.6 MHz, CDCl3) of compound **8a**.

**Figure S17**: 1H NMR (400 MHz, CDCl3)of compound **8b**.

**Figure S18**: 13C NMR (100.6 MHz, CDCl3)of compound **8b**.

**Figure S19**: 1H NMR (400 MHz, CDCl3) of compound **8c**.

**Figure S20**: 13C NMR (100.6 MHz, CDCl3)of compound **8c**.

**Figure S21**: 1H NMR (400 MHz, CDCl3)of compound **8d**.

**Figure S22**: 13C NMR (100.6 MHz, CDCl3)of compound **8d**.

References

1. Sheldrick, G. M. *Acta Crystallogr.* **2008**, *A64*, 112-122.
2. Farrugia, L. J. *J. Appl. Crystallogr.* **1999**, *32*, 837-838.
3. Pennington, W. T. *J. Appl. Crystallogr.* **1999**, *32*, 1028-1029.
4. Macrae, C. F.; Edgington, P. R.; McCabe, P.; Pidcock, E.; Shields, G. P.; Taylor, R.; Towler, M.; Van de Streek, J. *J. Appl. Crystallogr.* **2006**, *39*, 453-457.
5. (a) Franzblau, S. G.; Witzig, R. S.; Mclaughlin, J. C.; Torres, P.; Madico, G.; Hernandez, A.; Degnan, M. T.; Cook, M. B.; Quenzer, V. K.; Ferguson, R. M.; Gilman*,* R. H.; *J. Clin. Microbiol.* 1998, *36*, 362–366; (b) Hu, Y-Q.; Xu, Z.; Zhang, S.; Wu, X.; Ding, J.-W.; Lv, Z.-S.; Feng, L.-S. *Eur. J Med. Chem.* 2017, *136*, 122-130.
